# Supplementary material
Source: Springer Nature journal article supplement (https://www.springermedizin.de/resource/supplementary/12943_2013_1220_MOESM2_ESM.pdf/9552346)

**A**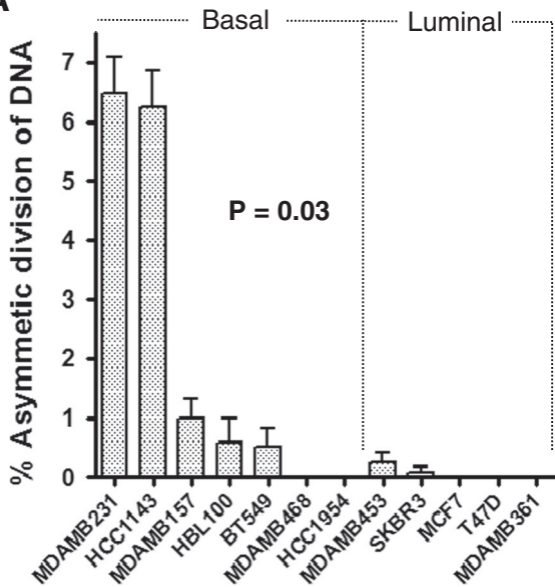**B**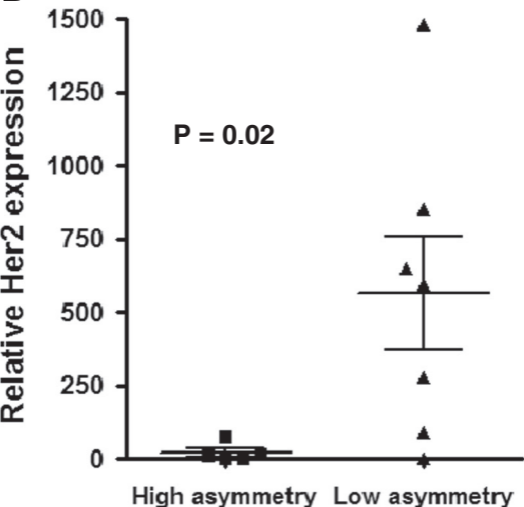

Supplement: MOESM2 [file 9552346]
